# Supplementary material for: MUC17 is an essential small intestinal glycocalyx component that is disrupted in Crohn’s disease
Source: JCI journal article supplement (doi:10.1172/jci.insight.181481), 2024-12-19
Supplement: sd2 [file 2]

Unedited blot and gel images

**MUC17 is an essential small intestinal glycocalyx component that is disrupted in Crohn's disease**

Elena Layunta *et al.*

\*Corresponding author. Email [thaher.pelaseyed@medkem.gu.se](mailto:thaher.pelaseyed@medkem.gu.se)

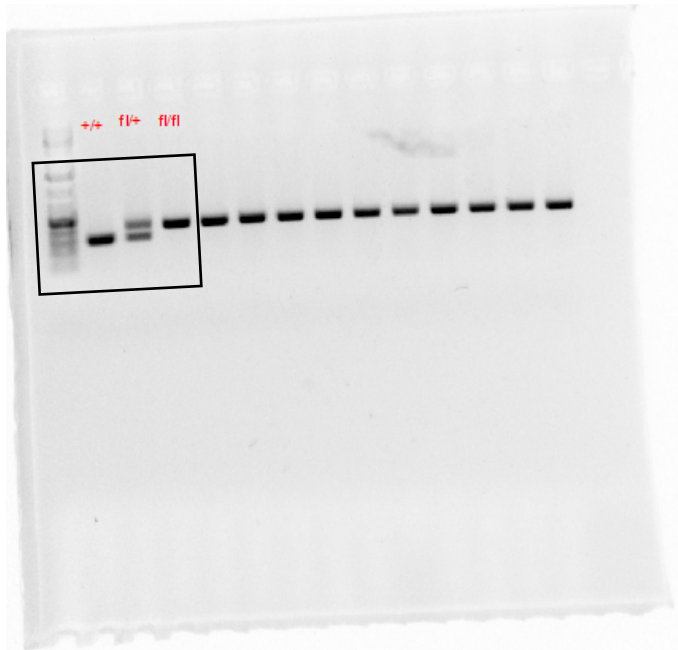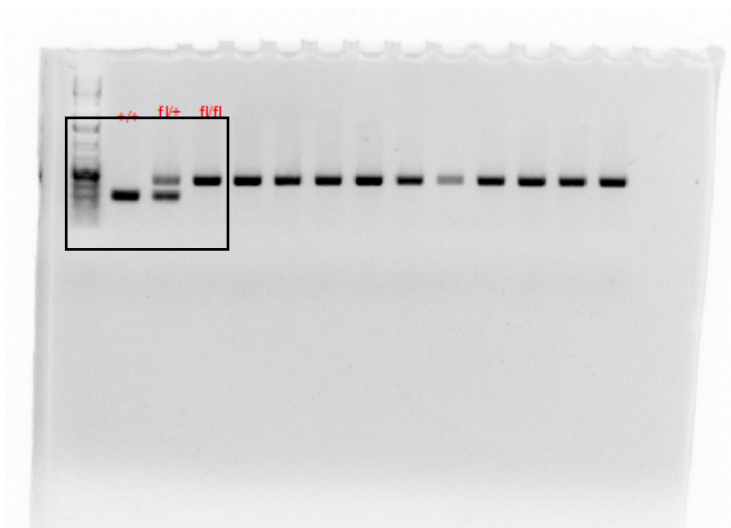

**Figure S2B.** Representative DNA agarose gels showing genotyping of the floxed *Muc17* allele. M, molecular weight.

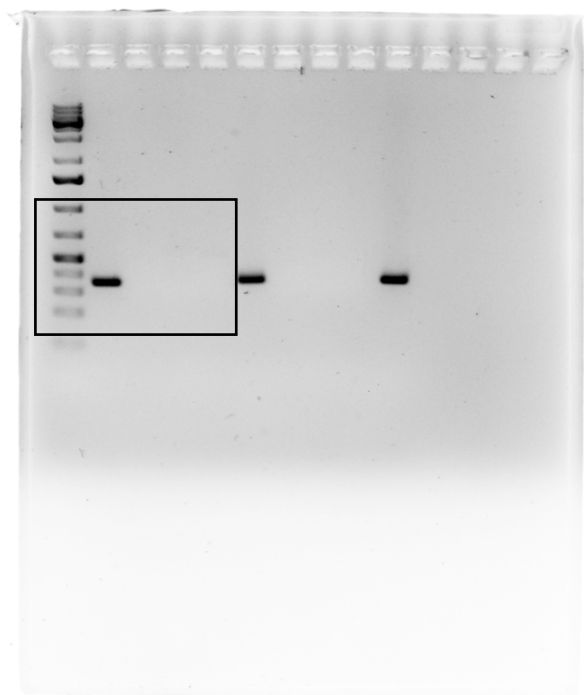

**Figure S2C.** Representative DNA agarose gels showing genotyping of the floxed *Muc17* alleles in the presence and absence of the *Vill-Cre* allele in the small intestine (Si) and muscle tissues. M, molecular weight.

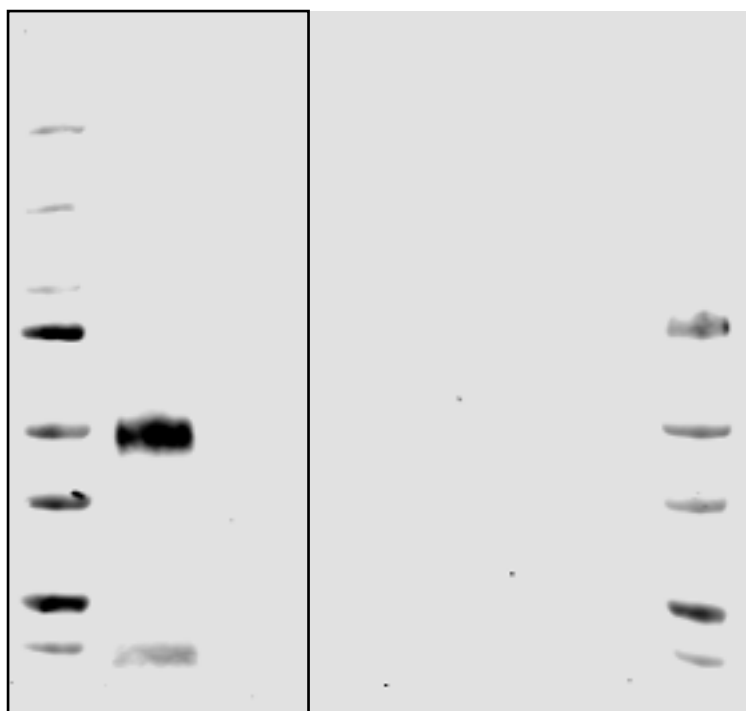

**Figure S2D.** Immunoblot (IB) of luminal vesicles isolated from the small intestine of *Muc17<sup>fl/fl</sup>* and *Muc17<sup>ΔIEC</sup>* mice.
